# Supplementary material for: Molecular structure of (5,10,15,20-tetrabutyl-2,3,7,8,12,13,17,18-octaethylporphyrinato)nickel(II)—correlation of nonplanarity with frontier orbital shifts †
Source: Royal Society of Chemistry journal article supplement (doi:10.1039/a905927j), 2000-01-01
Supplement: a905927j.doc [file a905927j.doc]

**Supplementary material for**

**Molecular structure of (5,10,15,20-tetrabutyl-2,3,7,8,12,13,17,18-octaethylporphyrinato)nickel(II) – Correlation of nonplanarity with frontier orbital shifts**

### Mathias O. Senge,*a Mark W. Renner,b Werner W. Kalischa and Jack Fajer*b

*aInstitut für Chemie, Organische Chemie, Freie Universität Berlin, Takustr. 3, D-14195 Berlin, Germany, e-mail:* [*mosenge@chemie.fu-berlin.de*](mailto:mosenge@chemie.fu-berlin.de)

*bDepartment of Applied Science, Brookhaven National Laboratory, Upton, New York 11973, USA, e-mail:* [*fajerj@bnl.gov*](mailto:fajerj@bnl.gov)

**Experimental Details for X-ray Absorption Spectroscopy.**

X-ray absorption experiments were performed at the Brookhaven National Synchrotron Light Source on beamline X-19A. Data were collected with Si 311 (X-19A) monochromator crystals with slits adjusted to give ~1-2 eV resolutions. The samples were measured in fluorescence mode with a Canberra 13-element detector. The sample was measured as a solution in toluene-d8 using previously published EXAFS cells.1 Data were collected in ~20 minute scans yielding >106 counts of signal at the nickel K-edge for each sample. Energies were calibrated against a nickel foil (8333 eV) which was present throughout the data collection. The data were analyzed using the MacXAFS EXAFS analysis package.2 The EXAFS oscillations for the samples and standard were isolated using standard methods: linear extrapolation and subtraction of a pre-edge bulk-absorption contribution, normalization of the edge step, interpolation onto a photoelectron momentum (*k*) grid, and removal of a smooth background with a series of three cubic splines. E0 was defined as the energy corresponding to the midpoint of the main absorption step. The resulting oscillations were weighted with *k*3 factors and Fourier-filtered to isolate first- and in some cases second-shell contributions as amplitude and phase functions. Quantitative comparisons between unknowns and standards were accomplished with nonlinear fits based on the general EXAFS equation.3,4 Ni(II)porphycene was used as an experimental standard (Ni-N distance = 1.89Å).5 Theoretical standards were generated using FEFF 6.01, an *ab initio*,curved-wave, multiple scattering EXAFS simulation code.6,7

**References.**

(1) L. R. Furenlid, M. W. Renner and J. Fajer, *Rev. Sci. Instrum.*, 1990, **61**, 1326.

(2) C. E. Bouldin, W. T. Elam and L. Furenlid, *Physica B*, 1995, **208&209**, 739.

(3) E. A. Stern and S. M. Heald, in *Handbook on Synchrotron Radiation*, eds. E. A. Stern and S. M. Heald, Springer-Verlag, North Holland, Amsterdam, 1983.

(4) B. K. Teo in *EXAFS: Basic Principles and Data Analysis*, ed. B. K. Teo, Springer-Verlag: Berlin, Heidelberg, New York, Tokyo, 1986.

(5) L. R. Furenlid, M. W. Renner, K. M. Smith and J. Fajer, *J. Am. Chem. Soc.*, 1990, **112**, 1634.

(6) J. Mustre de Leon, J. J. Rehr and S. I. Zabinsky, *Phys. Rev. B*, 1991, **44**, 4146.

(7) J. J. Rehr, M. Balci, K. Pramod, P. Koch, J. Lex and O. Ermer, *J. Am. Chem. Soc.*, 1991, **113**, 5135.

**Table S1.** **EXAFS fitting Results.**

| Compound | N | R (Å) | 2 (Å2) | 2 |
| --- | --- | --- | --- | --- |
| Ni(II)T(Bu)OEP | 4.0 | 1.87 | 0.002 | 0.044 |

N is the coordination number per metal. The metal- coordination atom distance R is determined from fits of the EXAFS data. 2 is the relative mean square deviation in R (the square of the Debye-Waller factor), 2 = 2unknown - 2standard. 2gof is a relative goodness-of-fit statistic, defined as (exp.-fit)2/exp2.

Experimental details: k range ~3.3 - 12, Hanning window = 0.5 Å-1, weighting k3, R Window ~0.8 - 2.2 Å for first shell fits, Hanning windows ~0.1 Å.

**Figure S1.** X-ray absorption near-edge structure for Ni(II)T(Bu)OEP in toluene at room temperature.

**Figure S2.** Fourier transform magnitude of the k3-weighted EXAFS oscillations for Ni(II)T(Bu)OEP in toluene at room temperature.
